# Supplementary material for: The Prognostic Role of STEAP1 Expression Determined via Immunohistochemistry Staining in Predicting Prognosis of Primary Colorectal Cancer: A Survival Analysis
Source: PubMed Central journal article supplement (PMC4849046; doi:10.3390/ijms17040592), 2016-04-19
Supplement: ijms-17-00592-s001.pdf [file ijms-17-00592-s001.pdf]

# Supplementary Materials: The Prognostic Role of STEAP1 Expression Determined via Immunohistochemistry Staining in Predicting Prognosis of Primary Colorectal Cancer: A Survival Analysis

Ching-Hsiao Lee, Sung-Lang Chen, Wen-Wei Sung, Hung-Wen Lai, Ming-Ju Hsieh, Hsu-Heng Yen, Tzu-Cheng Su, Yu-Hu Chiou, Chia-Yu Chen, Cheng-Yu Lin, Mei-Ling Chen and Chih-Jung Chen

**Table S1.** Relationships of STEAP1 expression with pathological parameters in colorectal cancer patients.

| Parameters   | Case Number | STEAP1 Expression |           | <i>p</i> Value |
|--------------|-------------|-------------------|-----------|----------------|
|              |             | Low               | High      |                |
| Tumor site   |             |                   |           |                |
| Ascending    | 15          | 5 (33.3)          | 10 (66.7) | 0.678          |
| Transverse   | 1           | 0 (0.0)           | 1 (100.0) |                |
| Descending   | 8           | 5 (62.5)          | 3 (37.5)  |                |
| Rectum       | 58          | 29 (50.0)         | 29 (50.0) |                |
| Sigmoid      | 26          | 11 (42.3)         | 15 (57.7) |                |
| Rectosigmoid | 10          | 5 (50.0)          | 5 (50.0)  |                |
| Cecum        | 4           | 1 (25.0)          | 3 (75.0)  |                |
| Missing      | 43          | 30 (69.8)         | 13 (30.2) |                |
| Histology    |             |                   |           |                |
| Non-mucinous | 154         | 84 (54.5)         | 70 (45.5) | 0.034          |
| Mucinous     | 10          | 2 (20.0)          | 8 (80.0)  |                |
| Missing      | 1           | 0 (0.0)           | 1 (100.0) |                |
| Grade        |             |                   |           |                |
| 1            | 5           | 3 (60.0)          | 2 (40.0)  | 0.851          |
| 2            | 149         | 78 (52.3)         | 71 (47.7) |                |
| 3            | 11          | 5 (45.5)          | 6 (54.5)  |                |
